# Supplementary material for: Glucose metabolism is upregulated in the mononuclear cell proteome during sepsis and supports endotoxin-tolerant cell function
Source: Front Immunol. 2022 Nov 18;13:1051514. doi: 10.3389/fimmu.2022.1051514 (PMC9718365; doi:10.3389/fimmu.2022.1051514)
Supplement: Supplementary file 3 [file DataSheet_3.xlsx]

## Sheet: Description
Tab	Description
A	Biological process enrichment analysis for D0 DEPs
B	Biological process enrichment analysis for D7 DEPs
C	Metabolism-targeted Ingenuity Pathway Analysis for D0 DEPs
D	Metabolism-targeted Ingenuity Pathway Analysis for D7 DEPs

## Sheet: A
Biological Process	Number of DEGs D0	FDR D0
EXOCYTOSIS	107	3.46e-53
MYELOID LEUKOCYTE ACTIVATION	89	4.43e-48
MYELOID LEUKOCYTE MEDIATED IMMUNITY	82	1.36e-47
CELL ACTIVATION	124	3.16e-46
SECRETION	124	3.16e-46
IMMUNE EFFECTOR PROCESS	117	3.16e-46
CELL ACTIVATION INVOLVED IN IMMUNE RESPONSE	90	3.16e-46
LEUKOCYTE MEDIATED IMMUNITY	89	1.48e-38
BIOLOGICAL PROCESS INVOLVED IN SYMBIOTIC INTERACTION	91	1.19e-35
CELLULAR MACROMOLECULE LOCALIZATION	127	7.41e-35
PROTEIN CONTAINING COMPLEX SUBUNIT ORGANIZATION	126	9.86e-35
ESTABLISHMENT OF PROTEIN LOCALIZATION	123	2.52e-32
RESPONSE TO BIOTIC STIMULUS	106	1.18e-29
INTRACELLULAR TRANSPORT	107	1.34e-27
REGULATION OF ORGANELLE ORGANIZATION	86	5.47e-27
SMALL MOLECULE METABOLIC PROCESS	111	6e-27
POSITIVE REGULATION OF PROTEIN METABOLIC PROCESS	95	1.97e-24
POSITIVE REGULATION OF MOLECULAR FUNCTION	101	9.62e-24
DEFENSE RESPONSE	102	1.67e-23
ORGANIC ACID METABOLIC PROCESS	76	9.71e-23
ORGANONITROGEN COMPOUND BIOSYNTHETIC PROCESS	100	1.86e-22
DEFENSE RESPONSE TO OTHER ORGANISM	80	4.79e-22
REGULATION OF CELL DEATH	95	5.98e-22
CELLULAR PROTEIN CONTAINING COMPLEX ASSEMBLY	76	8.25e-22
APOPTOTIC PROCESS	103	1.14e-21
REGULATION OF RESPONSE TO STRESS	85	7.94e-21
PROTEOLYSIS	97	1.14e-20
CYTOSKELETON ORGANIZATION	83	2.46e-20
CELLULAR AMIDE METABOLIC PROCESS	76	3.97e-20
INTRACELLULAR PROTEIN TRANSPORT	75	4.87e-20
RESPONSE TO OXYGEN CONTAINING COMPOUND	91	7.15e-20
RESPONSE TO NITROGEN COMPOUND	73	8.9e-20
PEPTIDE METABOLIC PROCESS	65	1.22e-19
INNATE IMMUNE RESPONSE	68	2.42e-19
GENERATION OF PRECURSOR METABOLITES AND ENERGY	49	3.26e-19
REGULATION OF CELLULAR COMPONENT BIOGENESIS	66	5.22e-19
RESPONSE TO CYTOKINE	74	6.35e-19
CELLULAR MACROMOLECULE CATABOLIC PROCESS	74	1.1e-18
POSITIVE REGULATION OF CELLULAR COMPONENT ORGANIZATION	71	1.4e-18
MACROMOLECULE CATABOLIC PROCESS	81	2.27e-18
REGULATION OF TRANSPORT	90	3.8e-18
LOCOMOTION	96	1.79e-17
MEMBRANE ORGANIZATION	63	2.53e-17
ACTIN FILAMENT BASED PROCESS	57	3.2e-17
POSITIVE REGULATION OF CATALYTIC ACTIVITY	78	3.3e-17
REGULATION OF PROTEIN MODIFICATION PROCESS	85	3.35e-17
AMIDE BIOSYNTHETIC PROCESS	60	4.22e-17
CELL MIGRATION	84	4.28e-17
POSITIVE REGULATION OF BIOSYNTHETIC PROCESS	94	8.52e-17
RESPONSE TO ENDOGENOUS STIMULUS	84	9.41e-17
POSITIVE REGULATION OF GENE EXPRESSION	66	1.53e-16
PEPTIDE BIOSYNTHETIC PROCESS	54	1.53e-16
REGULATION OF PHOSPHORUS METABOLIC PROCESS	83	1.79e-16
POSITIVE REGULATION OF IMMUNE SYSTEM PROCESS	65	1.8e-16
BIOLOGICAL ADHESION	79	1.8e-16
PROTEIN LOCALIZATION TO ORGANELLE	63	2.32e-16
MONOCARBOXYLIC ACID METABOLIC PROCESS	50	2.32e-16
REGULATION OF IMMUNE SYSTEM PROCESS	82	2.95e-16
CELLULAR RESPONSE TO OXYGEN CONTAINING COMPOUND	68	1.13e-15
REGULATION OF RESPONSE TO EXTERNAL STIMULUS	63	1.35e-15
CENTRAL NERVOUS SYSTEM DEVELOPMENT	61	1.51e-15
NEGATIVE REGULATION OF CELLULAR COMPONENT ORGANIZATION	52	1.51e-15
REGULATION OF VESICLE MEDIATED TRANSPORT	43	3.28e-15
RESPONSE TO ABIOTIC STIMULUS	68	4.39e-15
PROTEIN PHOSPHORYLATION	80	6.55e-15
SUPRAMOLECULAR FIBER ORGANIZATION	50	1.08e-14
HEAD DEVELOPMENT	51	2.06e-14
ORGANELLE LOCALIZATION	47	3.14e-14
CELL CYCLE	86	3.15e-14
ORGANOPHOSPHATE METABOLIC PROCESS	60	3.95e-14
CHROMOSOME ORGANIZATION	67	4.38e-14
REGULATION OF INTRACELLULAR SIGNAL TRANSDUCTION	83	5.02e-14
LEUKOCYTE MIGRATION	41	5.46e-14
POSITIVE REGULATION OF ORGANELLE ORGANIZATION	44	5.63e-14
REGULATION OF HYDROLASE ACTIVITY	68	9.29e-14
RESPONSE TO OXIDATIVE STRESS	38	1.01e-13
REGULATION OF PROTEIN LOCALIZATION	54	1.3e-13
REGULATION OF IMMUNE RESPONSE	58	1.3e-13
HOMEOSTATIC PROCESS	85	2.73e-13
REGULATION OF DEFENSE RESPONSE	47	2.85e-13
NEGATIVE REGULATION OF GENE EXPRESSION	79	3.55e-13
CELLULAR RESPONSE TO CHEMICAL STRESS	33	3.6e-13
POSITIVE REGULATION OF TRANSPORT	53	6.91e-13
REGULATION OF INNATE IMMUNE RESPONSE	31	7.93e-13
POSITIVE REGULATION OF PHOSPHORUS METABOLIC PROCESS	56	9.87e-13
POSITIVE REGULATION OF PROTEIN MODIFICATION PROCESS	58	1.37e-12
REGULATION OF CYTOSKELETON ORGANIZATION	39	1.48e-12
CELLULAR RESPONSE TO NITROGEN COMPOUND	46	1.54e-12
POSITIVE REGULATION OF SIGNALING	78	1.57e-12
CELL CYCLE PROCESS	69	1.62e-12
CELLULAR LIPID METABOLIC PROCESS	58	1.79e-12
DNA METABOLIC PROCESS	54	3.16e-12
POSITIVE REGULATION OF IMMUNE RESPONSE	47	5.01e-12
TRANSLATIONAL INITIATION	24	5.21e-12
RESPONSE TO ORGANIC CYCLIC COMPOUND	52	6.87e-12
ANTIGEN PROCESSING AND PRESENTATION	26	6.87e-12
REGULATION OF CELLULAR CATABOLIC PROCESS	50	7.22e-12
CELL MORPHOGENESIS	55	7.99e-12
RESPONSE TO INORGANIC SUBSTANCE	39	8.43e-12
REGULATION OF CATABOLIC PROCESS	55	8.43e-12

## Sheet: B
Biological Process	Number of DEGs D7	FDR D7
EXOCYTOSIS	40	1.56e-19
SECRETION	49	1.66e-19
MYELOID LEUKOCYTE ACTIVATION	35	1.66e-19
MYELOID LEUKOCYTE MEDIATED IMMUNITY	31	7.61e-18
CELL ACTIVATION INVOLVED IN IMMUNE RESPONSE	34	1.89e-17
IMMUNE EFFECTOR PROCESS	41	2.35e-15
CELL ACTIVATION	43	3.75e-15
LEUKOCYTE MEDIATED IMMUNITY	32	2.35e-13
RESPONSE TO BIOTIC STIMULUS	42	4.78e-13
DEFENSE RESPONSE	43	3.61e-12
CELLULAR MACROMOLECULE LOCALIZATION	44	2.35e-11
DEFENSE RESPONSE TO OTHER ORGANISM	33	2.05e-10
REGULATION OF RESPONSE TO STRESS	35	5.66e-10
ESTABLISHMENT OF PROTEIN LOCALIZATION	40	6.2e-09
REGULATION OF RESPONSE TO EXTERNAL STIMULUS	28	1.5e-08
REGULATION OF DEFENSE RESPONSE	23	1.67e-08
RESPONSE TO CYTOKINE	29	6.3e-08
POSITIVE REGULATION OF PROTEIN METABOLIC PROCESS	33	6.83e-08
PROTEIN LOCALIZATION TO ORGANELLE	26	1.38e-07
PROTEIN CONTAINING COMPLEX SUBUNIT ORGANIZATION	37	1.79e-07
SMALL MOLECULE METABOLIC PROCESS	36	2.28e-07
POSITIVE REGULATION OF GENE EXPRESSION	26	5.52e-07
INNATE IMMUNE RESPONSE	25	5.52e-07
APOPTOTIC PROCESS	35	1.34e-06
RESPONSE TO OXYGEN CONTAINING COMPOUND	32	1.38e-06
REGULATION OF CELL DEATH	32	1.43e-06
ORGANIC ACID METABOLIC PROCESS	25	1.82e-06
REGULATION OF ORGANELLE ORGANIZATION	26	2.31e-06
RESPONSE TO OXIDATIVE STRESS	16	3.2e-06
ANTIMICROBIAL HUMORAL RESPONSE	10	3.71e-06
CELLULAR MACROMOLECULE CATABOLIC PROCESS	26	3.79e-06
DEFENSE RESPONSE TO BACTERIUM	14	4.15e-06
ORGANONITROGEN COMPOUND BIOSYNTHETIC PROCESS	32	6.34e-06
HOMEOSTATIC PROCESS	33	8.82e-06
INTRACELLULAR TRANSPORT	31	1.01e-05
REGULATION OF INFLAMMATORY RESPONSE	14	1.03e-05
POSITIVE REGULATION OF BIOSYNTHETIC PROCESS	33	1.39e-05
RESPONSE TO BACTERIUM	19	1.4e-05
REGULATION OF INTRACELLULAR SIGNAL TRANSDUCTION	31	1.76e-05
PEPTIDE BIOSYNTHETIC PROCESS	19	2.17e-05
PEPTIDE METABOLIC PROCESS	21	2.34e-05
MACROMOLECULE CATABOLIC PROCESS	27	2.35e-05
REGULATION OF TRANSPORT	30	2.78e-05
RESPONSE TO INORGANIC SUBSTANCE	16	3.15e-05
RESPONSE TO METAL ION	13	3.61e-05
AMIDE BIOSYNTHETIC PROCESS	20	5.71e-05
PROTEIN FOLDING IN ENDOPLASMIC RETICULUM	4	6.13e-05
CYTOKINE MEDIATED SIGNALING PATHWAY	19	6.26e-05
POSITIVE REGULATION OF RESPONSE TO EXTERNAL STIMULUS	15	6.85e-05
CHROMOSOME ORGANIZATION	24	7.1e-05
POSITIVE REGULATION OF SIGNALING	29	7.24e-05
POSITIVE REGULATION OF INTRACELLULAR SIGNAL TRANSDUCTION	21	0.000105
LOCOMOTION	31	0.000117
CELLULAR HOMEOSTASIS	20	0.000135
INFLAMMATORY RESPONSE	18	0.000138
RIBONUCLEOPROTEIN COMPLEX BIOGENESIS	14	0.000138
REGULATION OF IMMUNE SYSTEM PROCESS	27	0.000142
RESPONSE TO ABIOTIC STIMULUS	23	0.00015
NEGATIVE REGULATION OF GENE EXPRESSION	28	0.000163
CELLULAR RESPONSE TO CHEMICAL STRESS	12	0.000163
REGULATION OF MACROPHAGE ACTIVATION	6	0.000173
POSITIVE REGULATION OF IMMUNE SYSTEM PROCESS	21	0.000176
POSITIVE REGULATION OF MOLECULAR FUNCTION	28	0.000228
INTRACELLULAR PROTEIN TRANSPORT	22	0.000228
LEUKOCYTE MIGRATION	14	0.000281
BIOLOGICAL PROCESS INVOLVED IN SYMBIOTIC INTERACTION	20	0.000284
CELLULAR AMIDE METABOLIC PROCESS	22	0.000303
REGULATION OF INNATE IMMUNE RESPONSE	11	0.000343
CELLULAR PROTEIN CONTAINING COMPLEX ASSEMBLY	21	0.000363
PROTEOLYSIS	28	0.000363
DNA METABOLIC PROCESS	19	0.000487
ANATOMICAL STRUCTURE HOMEOSTASIS	13	0.000522
ORGANONITROGEN COMPOUND CATABOLIC PROCESS	23	0.000539
POSITIVE REGULATION OF TRANSPORT	18	0.000647
CELL CYCLE	28	0.000718
ORGANIC CYCLIC COMPOUND CATABOLIC PROCESS	15	0.000718
REGULATION OF IMMUNE RESPONSE	19	0.000851
NCRNA METABOLIC PROCESS	13	0.000851
CELLULAR RESPONSE TO OXYGEN CONTAINING COMPOUND	21	0.000851
CYTOSKELETON ORGANIZATION	23	0.000864
REGULATION OF CELLULAR AMIDE METABOLIC PROCESS	13	0.000864
CYTOKINE PRODUCTION	17	0.000908
POSITIVE REGULATION OF MAP KINASE ACTIVITY	9	0.000945
REGULATION OF CELLULAR COMPONENT MOVEMENT	20	0.000945
POSITIVE REGULATION OF DEFENSE RESPONSE	11	0.001
POSITIVE REGULATION OF ORGANELLE ORGANIZATION	14	0.00103
DEFENSE RESPONSE TO GRAM NEGATIVE BACTERIUM	6	0.00104
POSITIVE REGULATION OF CELLULAR COMPONENT ORGANIZATION	20	0.00114
POSITIVE REGULATION OF CYTOKINE PRODUCTION	12	0.00114
REGULATION OF VESICLE MEDIATED TRANSPORT	13	0.00116
RNA PROCESSING	23	0.00126
POSITIVE REGULATION OF TRANSLATION	7	0.00127
HUMORAL IMMUNE RESPONSE	11	0.0013
PHAGOCYTOSIS	11	0.00132
GENERATION OF PRECURSOR METABOLITES AND ENERGY	13	0.00137
ESTABLISHMENT OF CELL POLARITY	7	0.00145
POSITIVE REGULATION OF PROTEIN SERINE THREONINE KINASE ACTIVITY	10	0.00145
POSITIVE REGULATION OF PROTEIN MODIFICATION PROCESS	19	0.00145
SMALL MOLECULE BIOSYNTHETIC PROCESS	15	0.00145
CELLULAR RESPONSE TO DNA DAMAGE STIMULUS	17	0.00149

## Sheet: C
Ingenuity Canonical Pathways	-log(B-H p-value)	Ratio	z-score	Downregulated	No change	Upregulated	No overlap with dataset	Molecules
PI3K/AKT Signaling	3.3	0.0905	0.832	10/199 (5%)	0/199 (0%)	8/199 (4%)	181/199 (91%)	BCL2,CDKN1B,CHUK,GRB2,GYS1,IKBKG,ILK,INPP5B,ITGA2,ITGA2B,ITGA6,ITGAM,ITGB2,ITGB7,MAPK1,PPP2R2A,PTGS2,RALB
Salvage Pathways of Pyrimidine Ribonucleotides	1.3	0.0816	2.121	1/98 (1%)	0/98 (0%)	7/98 (7%)	90/98 (92%)	ADPGK,AK9,CDK6,GRK6,LIMK2,MAPK1,PAK2,PCK1
TCA Cycle II (Eukaryotic)	1.46	0.167	-2	4/24 (17%)	0/24 (0%)	0/24 (0%)	20/24 (83%)	ACO2,MDH1,SDHA,SDHB
LXR/RXR Activation	1.57	0.0813	-1	2/123 (2%)	0/123 (0%)	8/123 (7%)	113/123 (92%)	APOA5,CD36,ECHS1,LBP,LYZ,MMP9,PTGS2,S100A8,SERPINA1,TF
Isoleucine Degradation I	1.92	0.235	-1	3/17 (18%)	0/17 (0%)	1/17 (6%)	13/17 (76%)	ACADSB,ACAT1,ACAT2,ECHS1
Production of Nitric Oxide and Reactive Oxygen Species in Macrophages	2.18	0.0785	2.496	2/191 (1%)	0/191 (0%)	13/191 (7%)	176/191 (92%)	CAT,CHUK,CYBB,IKBKG,LYZ,MAP3K15,MAPK1,MPO,NCF2,NCF4,PPP2R2A,RHOA,S100A8,SERPINA1,SPI1
Oxidative Phosphorylation	2.35	0.101	-2.111	9/109 (8%)	0/109 (0%)	2/109 (2%)	98/109 (90%)	ATP5PD,COX5B,CYC1,NDUFA10,NDUFB10,NDUFS1,NDUFS3,NDUFV1,SDHA,SDHB,UQCRC1
mTOR Signaling	2.6	0.0806	2.449	6/211 (3%)	0/211 (0%)	11/211 (5%)	194/211 (92%)	EIF3C,EIF3D,EIF3K,EIF3L,EIF4G2,MAPK1,PPP2R2A,RALB,RHOA,RPS16,RPS19,RPS2,RPS21,RPS3A,RPS4X,RPS6KA1,RPS6KA3
HIF1α Signaling	2.64	0.0817	1.698	3/208 (1%)	0/208 (0%)	14/208 (7%)	191/208 (92%)	CYBB,ELOC,GCK,GPI,HK3,HSPA5,LDHA,MAPK1,MET,MMP8,MMP9,NCF2,RALB,SLC2A1,SLC2A14,SLC2A3,TF
tRNA Charging	2.74	0.179	1.134	2/39 (5%)	0/39 (0%)	5/39 (13%)	32/39 (82%)	AARS1,DARS1,EPRS1,HARS1,KARS1,MARS1,VARS1
Pentose Phosphate Pathway (Oxidative Branch)	4.66	1	2	0/4 (0%)	0/4 (0%)	4/4 (100%)	0/4 (0%)	G6PD,H6PD,PGD,PGLS
Pentose Phosphate Pathway	5.07	0.6	2.449	0/10 (0%)	0/10 (0%)	6/10 (60%)	4/10 (40%)	G6PD,H6PD,PGD,PGLS,RPIA,TKT

## Sheet: D
Ingenuity Canonical Pathways	-log(B-H p-value)	Ratio	z-score	Downregulated	No change	Upregulated	No overlap with dataset	Molecules
HIF1α Signaling	1.38	0.0385	2.121	0/208 (0%)	0/208 (0%)	8/208 (4%)	200/208 (96%)	HSPA5,LDHA,MMP8,MMP9,NCF2,SLC2A14,SLC2A3,TF
LXR/RXR Activation	1.67	0.0569	-1.89	2/123 (2%)	0/123 (0%)	5/123 (4%)	116/123 (94%)	FGA,LBP,LYZ,MMP9,PCYOX1,S100A8,TF
mTOR Signaling	0.357	0.019	#NUM!	2/211 (1%)	0/211 (0%)	2/211 (1%)	207/211 (98%)	EIF3C,EIF3D,RPS19,RPS28
Oxidative Phosphorylation	0.435	0.0275	#NUM!	3/109 (3%)	0/109 (0%)	0/109 (0%)	106/109 (97%)	COX5B,NDUFS1,NDUFV1
Pentose Phosphate Pathway	1.05	0.2	#NUM!	0/10 (0%)	0/10 (0%)	2/10 (20%)	8/10 (80%)	PGD,RPIA
Pentose Phosphate Pathway (Oxidative Branch)	0.597	0.25	#NUM!	0/4 (0%)	0/4 (0%)	1/4 (25%)	3/4 (75%)	PGD
PI3K/AKT Signaling	0.228	0.0151	#NUM!	1/199 (1%)	0/199 (0%)	2/199 (1%)	196/199 (98%)	BCL2,GYS2,JAK1
Production of Nitric Oxide and Reactive Oxygen Species in Macrophages	1.4	0.0419	0.816	1/191 (1%)	0/191 (0%)	7/191 (4%)	183/191 (96%)	CAT,JAK1,LYZ,MPO,NCF2,PCYOX1,S100A8,SPI1
Salvage Pathways of Pyrimidine Ribonucleotides	0.273	0.0204	#NUM!	0/98 (0%)	0/98 (0%)	2/98 (2%)	96/98 (98%)	ADPGK,GRK6
tRNA Charging	0.967	0.0769	#NUM!	1/39 (3%)	0/39 (0%)	2/39 (5%)	36/39 (92%)	EPRS1,HARS1,KARS1
